# Supplementary material
Source: PubMed Central journal article supplement (PMC4940361)
Supplement: NIHMS751011-supplement-10653_2016_9790_MOESM1_ESM.pdf [file NIHMS751011-supplement-10653_2016_9790_MOESM1_ESM.pdf]

Table S1: Input values for deterministic and probabilistic (Monte Carlo analysis) estimates of lead exposure

| Pathway                                | Variable                                                                             |                                                                                                 | Deterministic exposure assessment |         |                                                                                                                                           |                                                                                      | Probabilistic exposure assessment |                                                                                                                                   |                                                                                                                            |        |
|----------------------------------------|--------------------------------------------------------------------------------------|-------------------------------------------------------------------------------------------------|-----------------------------------|---------|-------------------------------------------------------------------------------------------------------------------------------------------|--------------------------------------------------------------------------------------|-----------------------------------|-----------------------------------------------------------------------------------------------------------------------------------|----------------------------------------------------------------------------------------------------------------------------|--------|
|                                        | Symbol                                                                               | Description (units)                                                                             | Population                        | Value   |                                                                                                                                           | Source                                                                               | Distribution                      | Geometric                                                                                                                         |                                                                                                                            | Source |
|                                        |                                                                                      |                                                                                                 |                                   | Central | High                                                                                                                                      |                                                                                      |                                   | Mean <sup>a</sup>                                                                                                                 | St. Dev. <sup>a</sup>                                                                                                      |        |
| <b>Soil and soil in dust ingestion</b> |                                                                                      |                                                                                                 |                                   |         |                                                                                                                                           |                                                                                      |                                   |                                                                                                                                   |                                                                                                                            |        |
| IR <sub>Soil</sub>                     | Soil ingestion rate (mg/day)                                                         | Child<br>Adult gardener<br>Adult household member                                               | 50                                | 200     | US EPA (2011); adult high estimates based on child high:central ratios                                                                    | Lognormal                                                                            | 31                                | 2.7                                                                                                                               | Mean: US EPA (2011); St. Dev.: Williams et al. (2013), van Holderbeke et al. (2008), Ozkaynak et al. (2011)                |        |
|                                        |                                                                                      |                                                                                                 | 20                                | 80      |                                                                                                                                           |                                                                                      | 12                                | 2.7                                                                                                                               |                                                                                                                            |        |
|                                        |                                                                                      |                                                                                                 | -                                 | -       |                                                                                                                                           |                                                                                      | -                                 | -                                                                                                                                 |                                                                                                                            |        |
| F <sub>Dust</sub>                      | Fraction of dust that is garden soil (mg/mg)                                         |                                                                                                 | 0.4                               | -       | Adjusted down by 20% from NYS DEC&DOH 2006; based on Chaney and Mielke, 1986; Allott et al., 1992; Trowbridge and Burmaster, 1997         | Point estimate                                                                       | 0.4                               | Adjusted down by 20% from NYS DEC&DOH 2006; based on Chaney and Mielke, 1986; Allott et al., 1992; Trowbridge and Burmaster, 1997 |                                                                                                                            |        |
| IR <sub>Dust</sub>                     | Dust ingestion rate (mg/day)                                                         | Child<br>Adult gardener<br>Adult household member                                               | 60                                | 100     | US EPA (2011); adult high estimates based on child high:central ratios                                                                    | Lognormal                                                                            | 21                                | 4.3                                                                                                                               | Mean: US EPA (2011); St. Dev.: Williams et al. (2013), Ozkaynak et al. (2011)                                              |        |
|                                        |                                                                                      |                                                                                                 | 30                                | 50      |                                                                                                                                           |                                                                                      | 10                                | 4.3                                                                                                                               |                                                                                                                            |        |
|                                        |                                                                                      |                                                                                                 | 30                                | 50      |                                                                                                                                           |                                                                                      | 10                                | 4.3                                                                                                                               |                                                                                                                            |        |
| C <sub>PbSoil</sub>                    | Lead concentration in garden soil (mg/kg)                                            | Child<br>Adult gardener                                                                         | 444                               | -       | Mitchell et al. (2014) (non-beds, 95% UCL on mean)                                                                                        | Lognormal                                                                            | 207                               | 2.6                                                                                                                               | Mitchell et al. 2014 (mean non-bed soil)                                                                                   |        |
|                                        |                                                                                      |                                                                                                 | 202                               | -       | Mitchell et al. (2014) (508 beds, 95% UCL on mean)                                                                                        |                                                                                      | 101                               | 2.6                                                                                                                               | Mitchell et al. 2014 (508 garden bed soil samples)                                                                         |        |
| C <sub>PbSoil-Dust</sub>               | Lead concentration in tracked-in soil (mg/kg) (soil that contributes to indoor dust) | Child<br>Adult gardener<br>Adult household member                                               | 444                               | -       | Mitchell et al. (2014) (non-beds, 95% UCL on mean)                                                                                        | Lognormal                                                                            | 207                               | 2.6                                                                                                                               | Mitchell et al. 2014 (mean non-bed soil)                                                                                   |        |
|                                        |                                                                                      |                                                                                                 | 444                               | -       |                                                                                                                                           |                                                                                      | 207                               | 2.6                                                                                                                               |                                                                                                                            |        |
|                                        |                                                                                      |                                                                                                 | 444                               | -       |                                                                                                                                           |                                                                                      | 207                               | 2.6                                                                                                                               |                                                                                                                            |        |
| EF <sub>Soil</sub>                     | Soil exposure frequency (days/year)                                                  | Child<br>Adult gardener<br>Adult household member                                               | 62                                | 186     | 31 week growing season, 2 d/wk (central) or 6 d/wk (high)                                                                                 | Lognormal                                                                            | 62                                | 2.0                                                                                                                               | NYSDEC/DOH (2006); Gregory, M, unpublished data / proposed distribution with P95 = 186 d/yr = 6 d/wk                       |        |
|                                        |                                                                                      |                                                                                                 | 62                                | 186     | NYSDEC/DOH (2006); Gregory, M, unpublished data                                                                                           |                                                                                      | 62                                | 2.0                                                                                                                               |                                                                                                                            |        |
|                                        |                                                                                      |                                                                                                 | -                                 | -       | -                                                                                                                                         |                                                                                      | -                                 | -                                                                                                                                 |                                                                                                                            |        |
| EF <sub>Dust</sub>                     | Dust exposure frequency (days/year)                                                  | Child<br>Adult gardener<br>Adult household member                                               | 217                               | -       | 31 week growing season (NYSDEC/DOH, 2006), 7 d/wk                                                                                         | Point estimate                                                                       | 217                               | -                                                                                                                                 | 31 week growing season (NYSDEC/DOH, 2006), 7 d/wk                                                                          |        |
|                                        |                                                                                      |                                                                                                 | 217                               | -       | -                                                                                                                                         |                                                                                      | 217                               | -                                                                                                                                 |                                                                                                                            |        |
|                                        |                                                                                      |                                                                                                 | 217                               | -       | -                                                                                                                                         |                                                                                      | 217                               | -                                                                                                                                 |                                                                                                                            |        |
| <b>Produce consumption</b>             |                                                                                      |                                                                                                 |                                   |         |                                                                                                                                           |                                                                                      |                                   |                                                                                                                                   |                                                                                                                            |        |
| BW                                     | Body weight (kg)                                                                     | Child (6 to < 11 years)<br>Adult gardener (50-59 years)<br>Adult household member (40-49 years) | 32                                | -       | US EPA (2011), Table 8-1                                                                                                                  | Lognormal                                                                            | 29.3                              | 1.3                                                                                                                               | US EPA 2011, Table 8-3, fitted distributions                                                                               |        |
|                                        |                                                                                      |                                                                                                 | 80                                | -       | Recommended weights for adult, child 6 - <11 years                                                                                        |                                                                                      | 80.8                              | 1.3                                                                                                                               |                                                                                                                            |        |
|                                        |                                                                                      |                                                                                                 | 80                                | -       | -                                                                                                                                         |                                                                                      | 81.4                              | 1.3                                                                                                                               |                                                                                                                            |        |
| IR <sub>Fruit</sub>                    | Fruiting vegetable consumption rate (mg/kg-day)                                      | Child<br>Adult gardener<br>Adult household member                                               | 110                               | 1024    | Survey median & 95th percentile for 46 gardeners, 47 adult household members & 13 children.                                               | Lognormal                                                                            | 134                               | 4.9                                                                                                                               | Survey median & 95th percentile of <b>consumers only</b> among the 46 gardeners, 47 adult household members & 13 children. |        |
|                                        |                                                                                      |                                                                                                 | 348                               | 2678    |                                                                                                                                           |                                                                                      | 353                               | 4.8                                                                                                                               |                                                                                                                            |        |
|                                        |                                                                                      |                                                                                                 | 196                               | 1483    |                                                                                                                                           |                                                                                      | 226                               | 3.2                                                                                                                               |                                                                                                                            |        |
| IR <sub>Leafy</sub>                    | Leafy vegetable consumption rate (mg/kg-day)                                         | Child<br>Adult gardener<br>Adult household member                                               | 62                                | 440     | Survey median & 95th percentile for 46 gardeners, 47 adult household members & 13 children.                                               | Lognormal                                                                            | 195                               | 2.4                                                                                                                               | Survey median & 95th percentile of <b>consumers only</b> among the 46 gardeners, 47 adult household members & 13 children. |        |
|                                        |                                                                                      |                                                                                                 | 165                               | 818     |                                                                                                                                           |                                                                                      | 220                               | 3.2                                                                                                                               |                                                                                                                            |        |
|                                        |                                                                                      |                                                                                                 | 69                                | 596     |                                                                                                                                           |                                                                                      | 127                               | 2.8                                                                                                                               |                                                                                                                            |        |
| IR <sub>Root</sub>                     | Root vegetable consumption rate (mg/kg-day)                                          | Child<br>Adult gardener<br>Adult household member                                               | 3                                 | 233     | Survey median & 95th percentile for 46 gardeners, 47 adult household members & 13 children.                                               | Lognormal                                                                            | 21                                | 8.6                                                                                                                               | Survey median & 95th percentile of <b>consumers only</b> among the 46 gardeners, 47 adult household members & 13 children. |        |
|                                        |                                                                                      |                                                                                                 | 39                                | 335     |                                                                                                                                           |                                                                                      | 85                                | 3.1                                                                                                                               |                                                                                                                            |        |
|                                        |                                                                                      |                                                                                                 | 7                                 | 297     |                                                                                                                                           |                                                                                      | 45                                | 4.0                                                                                                                               |                                                                                                                            |        |
| IR <sub>Herb</sub>                     | Herb consumption rate (mg/kg-day)                                                    | Child<br>Adult gardener<br>Adult household member                                               | 1                                 | 103     | Survey median & 95th percentile for 46 gardeners, 47 adult household members & 13 children.                                               | Lognormal                                                                            | 4                                 | 7.8                                                                                                                               | Survey median & 95th percentile of <b>consumers only</b> among the 46 gardeners, 47 adult household members & 13 children. |        |
|                                        |                                                                                      |                                                                                                 | 10                                | 143     |                                                                                                                                           |                                                                                      | 39                                | 3.4                                                                                                                               |                                                                                                                            |        |
|                                        |                                                                                      |                                                                                                 | 0                                 | 57      |                                                                                                                                           |                                                                                      | 11                                | 4.2                                                                                                                               |                                                                                                                            |        |
| C <sub>PbFruit</sub>                   | Fruiting vegetable Pb concentration (µg/kg fw)                                       |                                                                                                 | 23                                | -       | McBride et al. (2014) - vegetables from NYC community gardens (fruiting n = 67; leafy n = 53, root n = 23; herb n = 16) (95% UCL on mean) | Lognormal                                                                            | 11                                | 2.1                                                                                                                               | McBride et al. (2014) - vegetables from NYC community gardens (fruiting n = 67; leafy n = 53, root n = 23; herb n = 16)    |        |
| C <sub>PbLeafy</sub>                   | Leafy vegetable Pb concentration (µg/kg fw)                                          |                                                                                                 | 169                               | -       |                                                                                                                                           | Lognormal                                                                            | 68                                | 2.4                                                                                                                               |                                                                                                                            |        |
| C <sub>PbRoot</sub>                    | Root vegetable Pb concentration (µg/kg fw)                                           |                                                                                                 | 643                               | -       |                                                                                                                                           | Lognormal                                                                            | 111                               | 3.5                                                                                                                               |                                                                                                                            |        |
| C <sub>PbHerb</sub>                    | Herb Pb concentration (µg/kg fw)                                                     |                                                                                                 | 724                               | -       |                                                                                                                                           | Lognormal                                                                            | 293                               | 2.3                                                                                                                               |                                                                                                                            |        |
| FC <sub>Fruit</sub>                    | Fraction of population consuming garden-grown fruiting vegetables                    | Child<br>Adult gardener<br>Adult household member                                               | -                                 | -       |                                                                                                                                           | Point estimate                                                                       | 1.0                               | -                                                                                                                                 | Survey responses for 46 gardeners, 47 adult household members, & 13 children                                               |        |
|                                        |                                                                                      |                                                                                                 | -                                 | -       |                                                                                                                                           |                                                                                      | 1.0                               | -                                                                                                                                 |                                                                                                                            |        |
|                                        |                                                                                      |                                                                                                 | -                                 | -       |                                                                                                                                           |                                                                                      | 0.89                              | -                                                                                                                                 |                                                                                                                            |        |
| FC <sub>Leafy</sub>                    | Fraction of population consuming garden-grown leafy vegetables                       | Child<br>Adult gardener<br>Adult household member                                               | -                                 | -       |                                                                                                                                           | Point estimate                                                                       | 0.62                              | -                                                                                                                                 | Survey responses for 46 gardeners, 47 adult household members, & 13 children                                               |        |
|                                        |                                                                                      |                                                                                                 | -                                 | -       |                                                                                                                                           |                                                                                      | 0.83                              | -                                                                                                                                 |                                                                                                                            |        |
|                                        |                                                                                      |                                                                                                 | -                                 | -       |                                                                                                                                           |                                                                                      | 0.68                              | -                                                                                                                                 |                                                                                                                            |        |
| FC <sub>Root</sub>                     | Fraction of population consuming garden-grown root vegetables                        | Child<br>Adult gardener<br>Adult household member                                               | -                                 | -       |                                                                                                                                           | Point estimate                                                                       | 0.62                              | -                                                                                                                                 | Survey responses for 46 gardeners, 47 adult household members, & 13 children                                               |        |
|                                        |                                                                                      |                                                                                                 | -                                 | -       |                                                                                                                                           |                                                                                      | 0.67                              | -                                                                                                                                 |                                                                                                                            |        |
|                                        |                                                                                      |                                                                                                 | -                                 | -       |                                                                                                                                           |                                                                                      | 0.55                              | -                                                                                                                                 |                                                                                                                            |        |
| FC <sub>Herb</sub>                     | Fraction of population consuming garden-grown herbs                                  | Child<br>Adult gardener<br>Adult household member                                               | -                                 | -       |                                                                                                                                           | Point estimate                                                                       | 0.69                              | -                                                                                                                                 | Survey responses for 46 gardeners, 47 adult household members, & 13 children                                               |        |
|                                        |                                                                                      |                                                                                                 | -                                 | -       |                                                                                                                                           |                                                                                      | 0.61                              | -                                                                                                                                 |                                                                                                                            |        |
|                                        |                                                                                      |                                                                                                 | -                                 | -       |                                                                                                                                           |                                                                                      | 0.51                              | -                                                                                                                                 |                                                                                                                            |        |
| <b>Egg consumption</b>                 |                                                                                      |                                                                                                 |                                   |         |                                                                                                                                           |                                                                                      |                                   |                                                                                                                                   |                                                                                                                            |        |
| IR <sub>Egg</sub>                      | Egg consumption rate (mg/kg-day)                                                     |                                                                                                 | 480                               | 1690    | US EPA (2011), Table 13-40 (median and 95th percentile)                                                                                   | Lognormal                                                                            | 470                               | 2.3                                                                                                                               | US EPA (2011) Exposure Factors Handbook, Table13-40                                                                        |        |
| C <sub>PbSoil-Egg</sub>                | Lead concentration in chickens' soil (mg/kg)                                         |                                                                                                 | 428                               | -       | Mitchell et al. (2014) (non-beds, 95% UCL on mean)                                                                                        | Lognormal                                                                            | 207                               | 2.6                                                                                                                               | Mitchell et al. 2014 (mean non-bed soil)                                                                                   |        |
| C <sub>PbEgg</sub>                     | Egg lead concentration (µg/kg fw)                                                    |                                                                                                 | 40                                | -       | Estimated using 95% UCL on mean non-bed soil from Mitchell et al. (2014) and soil/egg relationship based on Spliethoff et al. (2013)      | Calculated as log(C <sub>PbEgg</sub> ) = 0.95 * log(C <sub>PbSoil-Egg</sub> ) - 0.90 |                                   |                                                                                                                                   | Calculated from non-bed soil concentration using soil/egg relationship based on Spliethoff et al. (2013)                   |        |
| FC <sub>Egg</sub>                      | Fraction of population consuming garden-raised eggs                                  |                                                                                                 | -                                 | -       |                                                                                                                                           | Point estimate                                                                       | 0.04                              |                                                                                                                                   | % of NYC community gardens that report having chickens (Gittelman et al., 2010)                                            |        |

<sup>a</sup> Lognormal distributions are defined by geometric mean and geometric standard deviation (based on the arithmetic mean and standard deviation of the normal probability distribution for the log transformed values).
