# Supplementary material
Source: PubMed Central journal article supplement (PMC4940361)
Supplement: NIHMS751011-supplement-10653_2016_9790_MOESM2_ESM.pdf [file NIHMS751011-supplement-10653_2016_9790_MOESM2_ESM.pdf]

**Table S2.** Deterministic estimates of central tendency total Pb exposures for a range of bed and non-bed soil Pb concentrations. Shaded cells represent soil Pb concentration estimates used for NYC community gardens.

| Non-bed soil [Pb] (mg/kg) | Gardener: bed soil [Pb] (mg/kg) |      |      |      |      | Household members |       |
|---------------------------|---------------------------------|------|------|------|------|-------------------|-------|
|                           | 100                             | 202  | 400  | 1000 | 2000 | Child             | Adult |
| 100                       | 6.9                             | 7.2  | 7.9  | 9.9  | 13.3 | 2.9               | 2.7   |
| 444                       | 10.5                            | 10.8 | 11.5 | 13.6 | 16.9 | 11.2              | 6.4   |
| 1000                      | 16.3                            | 16.6 | 17.3 | 19.3 | 22.7 | 24.6              | 12.1  |
| 2000                      | 26.5                            | 26.9 | 27.5 | 29.6 | 33.0 | 48.6              | 22.4  |
